1 **Interocular Symmetry and Repeatability of Foveal Outer Nuclear Layer Thickness in**  
2 **Congenital Achromatopsia**

3 Rebecca R. Mastey<sup>1</sup>; Katie M. Litts<sup>1</sup>; Christopher S. Langlo<sup>2</sup>; Emily J. Patterson<sup>1</sup>; Margaret R.  
4 Strampe<sup>1,3</sup>; Joseph Carroll<sup>1,2</sup>

5 1. Ophthalmology & Visual Sciences, Medical College of Wisconsin, Milwaukee, WI, United States

6 2. Cell Biology, Neurobiology, & Anatomy, Medical College of Wisconsin, Milwaukee, WI, United  
7 States

8 3. University of Minnesota Medical School, Minneapolis, MN, United States

9 **Running title:** Symmetry and Repeatability of ONL Thickness in Achromatopsia

10 **Word count:** 2496/2500 words

11 **Corresponding Author:** Joseph Carroll, Department of Ophthalmology & Visual Sciences,  
12 Medical College of Wisconsin, 925 N 87<sup>th</sup> St, Milwaukee, WI 53226-0509  
13 Email: [jcarroll@mcw.edu](mailto:jcarroll@mcw.edu); Phone: (414) 955-2052

14  
15 **Financial Disclosures:** J. Carroll: MeiraGTx (Consultant), AGTC (Research Support), OptoVue  
16 (Research Support)

17 **Key Words:** Achromatopsia; Outer Nuclear Layer; Fovea; Optical Coherence Tomography;  
18 Cone Photoreceptors

19

20 **Precise: (21/35 Submitted separately as “Highlights” file)** We examined the intraobserver  
21 repeatability and interocular symmetry of foveal outer nuclear layer (ONL) thickness  
22 measurements in patients with congenital achromatopsia.

23

24 **ABSTRACT:** (199/350 words)

25           **Purpose:** To examine the intraobserver repeatability of foveal outer nuclear layer (ONL)  
26 thickness measurements and evaluate interocular symmetry for patients with achromatopsia  
27 (ACHM) and controls.

28           **Design:** Cross-sectional study.

29           **Subjects:** Sixty-four patients with *CNGA3*- or *CNGB3*-associated ACHM and 38 patients  
30 with normal vision were recruited for analysis.

31           **Methods:** Horizontal line scans through the fovea of each eye were acquired using  
32 optical coherence tomography. Three foveal ONL thickness measurements were made by a  
33 single observer using custom software to analyze repeatability. Interocular symmetry was  
34 assessed using the average of the three measurements for each eye.

35           **Main Outcome Measures:** The main parameter being measured is foveal ONL  
36 thickness.

37           **Results:** Mean ( $\pm$  SD) foveal ONL thickness for ACHM patients was  $74.86 \pm 17.82\mu\text{m}$   
38 (OD) and  $75.30 \pm 15.68\mu\text{m}$  (OS) compared to  $110.60 \pm 15.67\mu\text{m}$  (OD) and  $110.53 \pm 13.91\mu\text{m}$   
39 (OS) for controls. Foveal ONL thickness did not differ between eyes for ACHM ( $p = 0.821$ ) or  
40 control patients ( $p = 0.961$ ). Intraobserver repeatability was high for foveal ONL measurements  
41 in ACHM patients (ICC = 0.939, OD and 0.915, OS) and controls (ICC = 0.991, OD and 0.984,  
42 OS).

43           **Conclusions:** Foveal ONL thickness can be measured with excellent repeatability.  
44 While foveal ONL thickness is reduced in ACHM compared to controls, the high interocular  
45 symmetry indicates that contralateral ONL measurements could be used as a negative control  
46 in early-phase monocular treatment trials.

47

## 48 INTRODUCTION:

49 Congenital achromatopsia (ACHM) is an autosomal recessive inherited cone dysfunction  
50 syndrome, affecting approximately 1 in 30,000 people worldwide.<sup>1</sup> It is characterized by  
51 increased light sensitivity, nystagmus, reduced visual acuity, and reduced or absent color vision.  
52 To date, mutations in six genes have been associated with ACHM: *CNGA3*, *CNGB3*, *GNAT2*,  
53 *PDE6C*, *PDE6H* and *ATF6*<sup>2-5</sup>— with *CNGA3* and *CNGB3* mutations accounting for nearly 70%  
54 of all ACHM cases.<sup>6</sup> ACHM is generally accepted to be stable (or at worst, slowly progressing in  
55 some patients), though there are conflicting findings regarding the progressive nature of  
56 ACHM.<sup>7-11</sup> The relative stability of the disease, in addition to recent success of gene therapy in  
57 the mouse, canine, and sheep<sup>12-14</sup> models, has made ACHM a well-suited disease for exploring  
58 gene therapy options in humans. A number of gene therapy efforts underway are seeking to  
59 restore cone function in patients with ACHM;<sup>15-19</sup> however, a prerequisite for therapeutic  
60 success is that the individual retina being treated contains residual cone photoreceptors.

61 A number of studies have used a variety of imaging approaches to examine remnant  
62 cone structure in patients with ACHM. Adaptive optics scanning light ophthalmoscopy (AOSLO)  
63 can be used to non-invasively image the rod and cone photoreceptors with cellular resolution.<sup>20-</sup>  
64 <sup>22</sup> Confocal AOSLO imaging in patients with ACHM reveals an absence of normal waveguiding  
65 cones and an intact rod mosaic.<sup>23-25</sup> In contrast, non-confocal split-detector AOSLO imaging can  
66 be used to resolve cone inner segments in a manner independent of their ability to waveguide.<sup>26</sup>  
67 This technique has been used to reveal extensive, yet variable, residual cone structure in  
68 patients with ACHM.<sup>25,26</sup> However, even non-confocal split-detector AOSLO-based estimates of  
69 remnant cone structure may underestimate the therapeutic potential of a given retina. This is  
70 evidenced in retinitis pigmentosa where the disease sequence starts with outer segment  
71 shortening, followed by inner segment swelling, and finally loss of the cone nuclei.<sup>27</sup> Therefore,  
72 assessing the thickness of the foveal outer nuclear layer (ONL), comprised nearly exclusively of

73 cone nuclei, may provide important auxiliary information regarding remnant cone structure in  
74 patients with ACHM.

75         Optical coherence tomography (OCT) has previously been used for analysis of many  
76 structures within the macular region of patients with ACHM. Variable ellipsoid zone (EZ)  
77 disruption has been observed,<sup>10,24,25,28,29</sup> with the textbook presentation of a hyporeflective zone  
78 being reported between 11%-58% of cases in previous studies of ACHM.<sup>10,24,29,30</sup> In addition,  
79 foveal hypoplasia (persistence of one or more inner retinal layers at the fovea) is a common  
80 feature found in patients with ACHM.<sup>24,29,30</sup> With respect to the ONL, patients with ACHM show  
81 significant thinning compared to controls,<sup>25,29,30</sup> though interocular symmetry has not been  
82 assessed. Defining ONL symmetry would be valuable data especially for studies where one eye  
83 is treated, and the other is used as a baseline comparison. Furthermore, the prevalence of  
84 hypoplasia can complicate delineation of the ONL boundaries in patients with ACHM, possibly  
85 affecting the repeatability of such measures. This is of great significance for studies aimed at  
86 evaluating longitudinal changes in ONL structure. Here, we used OCT to examine the  
87 interocular symmetry of the ONL at the fovea in patients with ACHM and additionally sought to  
88 establish the intraobserver repeatability of these measurements using custom software (OCT  
89 Reflectivity Analytics; ORA).<sup>31</sup>

90

## 91 **MATERIALS AND METHODS:**

### 92 **Subjects**

93         This research followed the tenets of the Declaration of Helsinki and was approved by the  
94 Institutional Review Board at the Medical College of Wisconsin (PRO00030741). Images from  
95 64 patients genetically confirmed with *CNGA3*- or *CNGB3*-associated ACHM were used for this  
96 study and 38 patients with normal vision were used as controls. The demographics of the

97 patient populations are shown in **Table 1**. If a patient had multiple visits, the session for analysis  
98 was determined by the date that had both eyes imaged and the best image quality (assessed  
99 subjectively by a single observer, R.R.M).

100 **Table 1.**

| Parameter                                          | Control          | ACHM                              | P-value    |
|----------------------------------------------------|------------------|-----------------------------------|------------|
| Sex                                                | 18M, 20F         | 33M, 31F                          | p = 0.838  |
| Gene affected                                      | NA               | 15 <i>CNGA3</i> , 49 <i>CNGB3</i> | NA         |
| Age, yrs (Mean $\pm$ SD)                           | 28.8 $\pm$ 10.9  | 24.8 $\pm$ 14.8                   | p = 0.023* |
| <b>Axial Length, mm (Mean <math>\pm</math> SD)</b> |                  |                                   |            |
| OD                                                 | 24.12 $\pm$ 1.30 | 24.06 $\pm$ 2.06                  | p = 0.631  |
| OS                                                 | 24.09 $\pm$ 1.31 | 24.01 $\pm$ 2.07                  | p = 0.826  |

101 M = Male; F = Female; NA = Not applicable; \* = Statistically significant

102

### 103 **OCT Imaging**

104 Prior to imaging, all patients with ACHM were dilated using either cyclomydril or a  
105 combination of tropicamide (1%) and phenylephrine hydrochloride (2.5%) for cycloplegia and  
106 pupillary dilation respectively. Control patients were imaged without dilation, as a previous study  
107 evaluated layer thickness measurements pre- and post-dilation and found no change.<sup>32</sup> The  
108 Bioptigen spectral domain-OCT (Leica Microsystems, Wetzlar, Germany) was used to acquire  
109 line scans at the fovea in both eyes of each subject. Horizontal scans (1,000 A-scans per B-  
110 scan, 80-100 repeated B-scans) were obtained with a nominal scan length of 6mm or 7mm. For  
111 each eye, multiple B-scans (n = 2 to 68) were registered and averaged in ImageJ<sup>33</sup> to create a  
112 single .tif image (processed line scan) with improved contrast for analysis, as previously  
113 reported.<sup>34,35</sup> In two eyes from two different subjects, the line scan was not positioned at the  
114 fovea; therefore, a single B-scan was extracted from the volume scan and used for analysis.  
115 Processed line scans were cross-referenced with volume scans, when available (62 of 64  
116 patients with ACHM), to confirm the foveal position of the line scan. For the foveal line scans,  
117 the integrity of the EZ was graded by two of three observers (K.L., C.S.L., J.C.) using previous  
118 methods.<sup>10</sup> In summary, grade 1 corresponds to a continuous EZ band, grade 2 is EZ

119 disruption, grade 3 is the absence of the EZ band, grade 4 is the appearance of a hyporeflective  
120 zone, and grade 5 is outer retinal atrophy. In cases where the two observers disagreed (19/128  
121 eyes), the third observer graded the scan and the majority grade was used for further analysis  
122 of that scan. Three patients with grade 5 were excluded from ONL analysis as there is no outer  
123 retina present due to atrophy.

124

### 125 **Measuring Foveal ONL Thickness**

126 Before quantitative ONL analysis, each processed line scan was resampled to the same  
127 scale in both the axial and lateral directions. The foveal ONL thickness was measured in the  
128 logarithmic image using a 5-pixel wide longitudinal reflectivity profile (LRP) with custom software  
129 (OCT Reflectivity Analytics; ORA).<sup>31</sup> Each LRP measurement was made orthogonal to the  
130 retinal pigment epithelial layer (RPE) at the fovea, which was manually identified at the center of  
131 the deepest foveal depression. In 38 of 204 processed line scans, the image was required to be  
132 rotated as the RPE was not flat at the fovea and the LRP was unable to be rotated. This was  
133 done using Photoshop (Adobe Systems, San Jose, CA) by scaling the image so the horizontal  
134 and vertical scales matched, rotating the image relative to the RPE at the fovea, and then  
135 scaling the image back to the original dimensions. In scans with complete foveal excavation, the  
136 boundaries of the ONL were selected from the peaks of the LRP corresponding to the inner  
137 limiting membrane (ILM) and the external limiting membrane (ELM) (**Figure 1A**). In scans with  
138 foveal hypoplasia, the posterior boundary of the outer plexiform layer (OPL) was used as the  
139 anterior boundary of the ONL instead of the ILM (**Figure 1B**).<sup>8,10</sup> The distance between the two  
140 peaks, representing ONL thickness, was calculated and output by the software.<sup>31</sup> Three  
141 independent LRP estimates of foveal ONL thickness were obtained with the single grader  
142 (R.R.M.) masked to the prior measurements in order to assess repeatability. The mean of these  
143 three measurements was used for further analyses. Descriptive and comparative statistics were

144 calculated using GraphPad InStat (3.1) (GraphPad Software, La Jolla, CA), with intraclass  
145 correlation coefficient (ICC) being estimated using R statistical software (R Statistical Software;  
146 Vienna, Austria). Data were tested for normality using the Shapiro-Wilk test to guide use of  
147 parametric or non-parametric statistical tests as appropriate.

148

## 149 **RESULTS:**

### 150 **Subjects**

151 As shown in **Table 1**, no statistical gender difference was observed between patients  
152 with ACHM and controls ( $p = 0.838$ , Fisher's Exact Test) and controls were found to be  
153 significantly older than patients with ACHM ( $p = 0.023$ , Mann-Whitney Test). Axial length for  
154 patients with ACHM compared to controls was not statistically different for either eye.  
155 Furthermore, no significant interocular difference in axial length was observed for either the  
156 ACHM patients ( $p = 0.272$ , paired t-test) or controls ( $p = 0.824$ , Wilcoxon Test).

157

### 158 **Foveal ONL Thickness Shows High Interocular Symmetry**

159 Consistent with previous reports,<sup>10,25,30</sup> ACHM patients on average had thinner foveal  
160 ONL measurements than control patients ( $p < 0.0001$ , OD, unpaired t-test), though there was  
161 considerable overlap between the groups (**Table 2, Figure 2**). ONL thickness at the fovea did  
162 not differ between eyes for ACHM ( $p = 0.821$ , Wilcoxon test) or control patients ( $p = 0.961$ ,  
163 Wilcoxon test), indicating high interocular symmetry in both populations (**Figure 2 and 3**). To  
164 assess ONL thickness in relation to EZ grade, only right eyes were used. For grade 1 scans, the  
165 mean  $\pm$  SD foveal ONL thickness was  $80.28 \pm 16.08\mu\text{m}$  ( $n = 23$ ), grade 2 scans  $80.87 \pm$   
166  $20.60\mu\text{m}$  ( $n = 18$ ), grade 3 scans  $67.26 \pm 12.58 \mu\text{m}$  ( $n = 2$ ) and grade 4 scans  $62.76 \pm 10.60\mu\text{m}$   
167 ( $n = 18$ ). ONL thickness between grades 1, 2, and 4 were found to be significantly different ( $p =$

168 0.0004, Kruskal-Wallis Test). There were only two patients with a grade 3, so they were not  
169 included in this comparison, and the three patients with a grade 5 were also excluded from the  
170 ONL analysis.

171

## 172 **Foveal ONL Thickness Shows Excellent Repeatability**

173 Despite substantial variability in foveal ONL thickness within each group, excellent  
174 intraobserver repeatability was observed for our measurements. ONL data for the three  
175 measurements from controls were normally distributed, whereas data for the three  
176 measurements for ACHM patients failed normality testing. The ACHM data was log transformed,  
177 after which it passed normality—further analysis for repeatability of patients with ACHM was  
178 completed using the log transformed data. ICC values for ACHM and control patients are shown  
179 in **Table 2**. Importantly, the 95% confidence intervals for both eyes of the control patients did not  
180 overlap with the confidence intervals for the patients with ACHM. This suggests that while both  
181 groups showed excellent repeatability, the ACHM scans demonstrated slightly less repeatable  
182 than for controls. Consistent with this, measurement error, reported here as the coefficient of  
183 variation, was also higher in ACHM (**Table 2**).

| Table 2.                               | Control     |             | ACHM*       |             |
|----------------------------------------|-------------|-------------|-------------|-------------|
|                                        | OD          | OS          | OD          | OS          |
| Mean ONL Thickness ( $\mu\text{m}$ )   | 110.60      | 110.53      | 74.86       | 75.30       |
| $\pm$ SD                               | $\pm$ 15.67 | $\pm$ 13.91 | $\pm$ 17.82 | $\pm$ 15.68 |
| Median ONL Thickness ( $\mu\text{m}$ ) | 110.72      | 110.99      | 75.90       | 74.15       |
| Interquartile Range ( $\mu\text{m}$ )  | 22.22       | 22.23       | 20.29       | 18.04       |
| ICC                                    | 0.991       | 0.984       | 0.939       | 0.915       |
| 95% CI                                 | 0.987-0.996 | 0.975-0.993 | 0.913-0.964 | 0.880-0.950 |
| Coefficient of Variation               | 1.31%       | 1.61%       | 6.08%       | 6.18%       |

184 \*ICC and coefficient of variation performed on log-transformed data

## 185 **DISCUSSION:**



186 In this study we observed ONL thinning in patients with ACHM, consistent with previous  
187 studies.<sup>10,25,29,30</sup> The overlap between the two groups highlights the significant variability present  
188 in ACHM. Additionally, the high repeatability of our ONL measurements suggests that the  
189 presence of foveal hypoplasia does not obviate robust assessment of ONL thickness in this  
190 challenging patient population.

191 Though high repeatability and ONL symmetry were observed overall, there were cases of  
192 poor repeatability in addition to examples of what appeared to be true asymmetry. Factors  
193 affecting repeatability were poor contrast and widening of boundaries as illustrated in **Figure 4**.  
194 The scan with the worst repeatability, or highest variance, was likely due to the poor contrast of  
195 the OPL in the right eye of JC\_10167 (**Figure 4, top left**). One of the three measurements was  
196 taken from the foveal reflex assuming there was no ONL, as opposed to the other  
197 measurements that were taken from the faint OPL, which was difficult to demarcate. Another  
198 possible cause for poor repeatability is the widening of the boundaries being measured, which  
199 causes the reflectivity peaks to be noisy and broad, making it hard to determine the true peak  
200 (**Figure 4, top right**). These unclear peaks also lead to higher variation within the repeated  
201 ONL measurements. However, true asymmetry was observed in a few patients illustrated in  
202 **Figure 4 (middle and bottom)**. JC\_10196 had the most notable asymmetry with an interocular  
203 difference of 19.54  $\mu\text{m}$ , likely due to the slightly elevated ELM observed in the right eye and  
204 perhaps some residual Henle fibers at the fovea of the left eye. The subject with the second  
205 greatest interocular ONL difference was JC\_10089 with a difference of 15.78  $\mu\text{m}$ . The OPL in  
206 the left eye appears to be more elevated, though the signal was poor. While the overall trend  
207 supports symmetric foveal ONL thickness within patients, one needs to be aware of isolated  
208 cases of asymmetry. Likewise, image quality is a major factor influencing the repeatability of  
209 ONL thickness measurements, so the results reported here may not generalize to other studies  
210 where the overall image quality may be better or worse than that observed here.

211 One limitation of our study is that the controls were significantly older than the ACHM  
212 population by an average of 4.03 years. Previous literature has conflicting reports of the effect  
213 age has on ONL measurements, with some reporting no significant changes,<sup>36,37</sup> some reporting  
214 thinning,<sup>38</sup> and some reporting thickening.<sup>39,40</sup> The controls used in this study were significantly  
215 older than the ACHM patients; however, if decreasing ONL thickness with age is assumed, then  
216 accounting for this within our study only would have further increased our significance of ONL  
217 thickness between the two groups. On the contrary, if ONL thickness increases with age, as  
218 suggested by Chui et al., this would amount to an increase in ONL thickness of about 0.5  $\mu\text{m}$ ,  
219 given the 4 years age difference.<sup>40</sup> As controls have a thicker ONL than ACHM by about 40  $\mu\text{m}$ ,  
220 the difference observed is more likely due to ACHM rather than age.

221 Understanding the disease progression for degenerating cone photoreceptors is also  
222 important. Milam et al. have previously observed the progression of degenerating  
223 photoreceptors in retinitis pigmentosa and reported that the shortening of the outer segment  
224 followed by the swelling of cone nuclei directly precedes complete cone photoreceptor loss.<sup>27</sup>  
225 Moreover, Jacobson et al. suggested there is a staging of cone degeneration in patients with  
226 Leber Congenital Amaurosis (LCA).<sup>41</sup> They proposed that within a given disease cone  
227 photoreceptors can be at varying stages of degeneration and often, regardless of intervention,  
228 some of them cannot be saved.<sup>41</sup> This was observed through a LCA clinical trial that reported  
229 improved vision of treated patients, yet ONL thickness continued to decrease (which is  
230 suggestive of disease progression).<sup>41,42</sup> It is currently unknown how “sick” a cone can be in  
231 ACHM and still be amenable to restoration of function via gene replacement therapy.  
232 Comprehensive assessment of the integrity of remnant foveal cones may benefit from  
233 combining ONL thickness data with measurements of cone inner segment density (assessed  
234 directly using non-confocal split-detector AOSLO) and outer segment integrity (as inferred from  
235 the relative cone reflectivity/waveguiding using confocal AOSLO).<sup>23,25</sup> Such data may help to  
236 paint a more complete picture of the therapeutic potential of a given retina, which could be of

237 use in helping frame (on a personalized basis) both patient and physician expectations  
238 regarding gene replacement therapy outcomes.

239 In conclusion, patients with ACHM have a thinner foveal ONL on average, though there  
240 is substantial variability between individuals. Our ONL thickness measurements derived from  
241 OCT showed both excellent intraobserver repeatability and minimal disparity in foveal ONL  
242 thickness between eyes, suggesting that the non-study eye can be used as a control in clinical  
243 trials. This is especially important as the extent of the natural progression of ACHM remains  
244 controversial.

245

246 **Acknowledgements:** The authors would like to thank Brian Higgins, Alex Salmon, and Dr.  
247 Melissa Wilk for their contributions to this work.

248

249

250

251

252

253

254

255

256

257

258

259 **Figures**

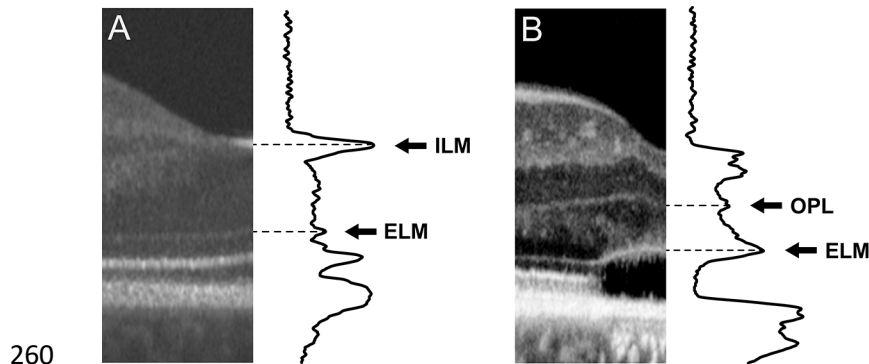

261 **Figure 1:** Demonstration of measuring ONL thickness in cases without hypoplasia (A) and with  
262 hypoplasia (B). When hypoplasia is not present, the ONL is defined as the distance between the  
263 ELM and the ILM. When hypoplasia is present, the ONL is then defined as the distance  
264 between the ELM and the next boundary, which is the OPL.<sup>10,43</sup> Images are displayed and were  
265 measured using a logarithmic scale. ILM, inner limiting membrane. ELM, external limiting  
266 membrane. OPL, outer plexiform layer.

267

268

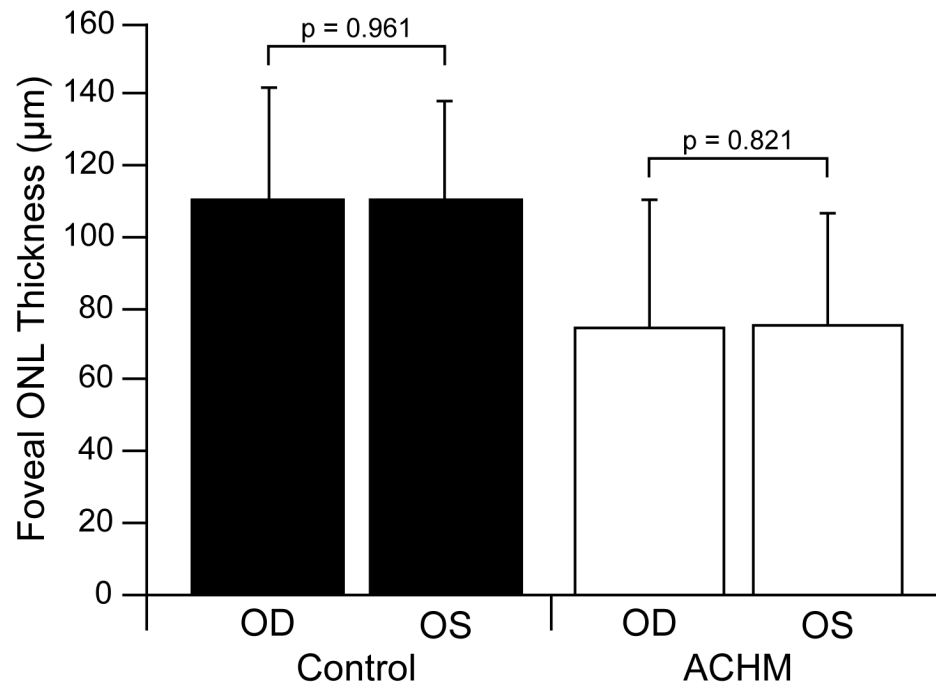

269

270

271 **Figure 2:** Mean foveal ONL thickness for both eyes of control and ACHM patients. On average,  
272 ACHM patients have a thinner foveal ONL than controls ( $p < 0.0001$ , OD, unpaired t-test). Error  
273 bars represent 2 standard deviations.

274

275

276

277

278

279

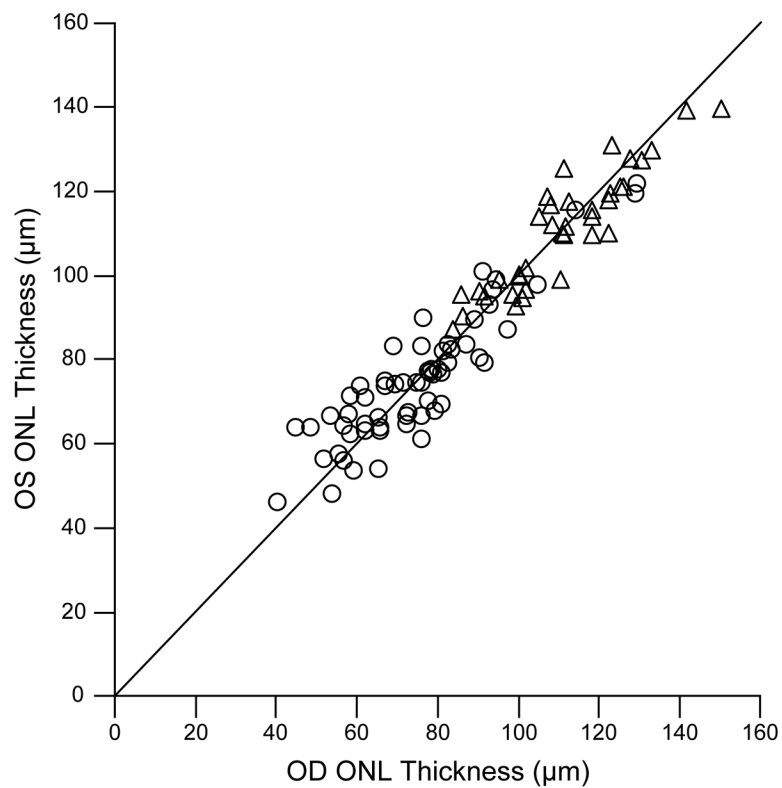

280

281

282 **Figure 3:** Interocular symmetry of foveal ONL thickness is shown for individuals with ACHM

283 (circles) and controls (triangles). The solid line represents perfect interocular symmetry.

284

285

286

287

288

289

290

291

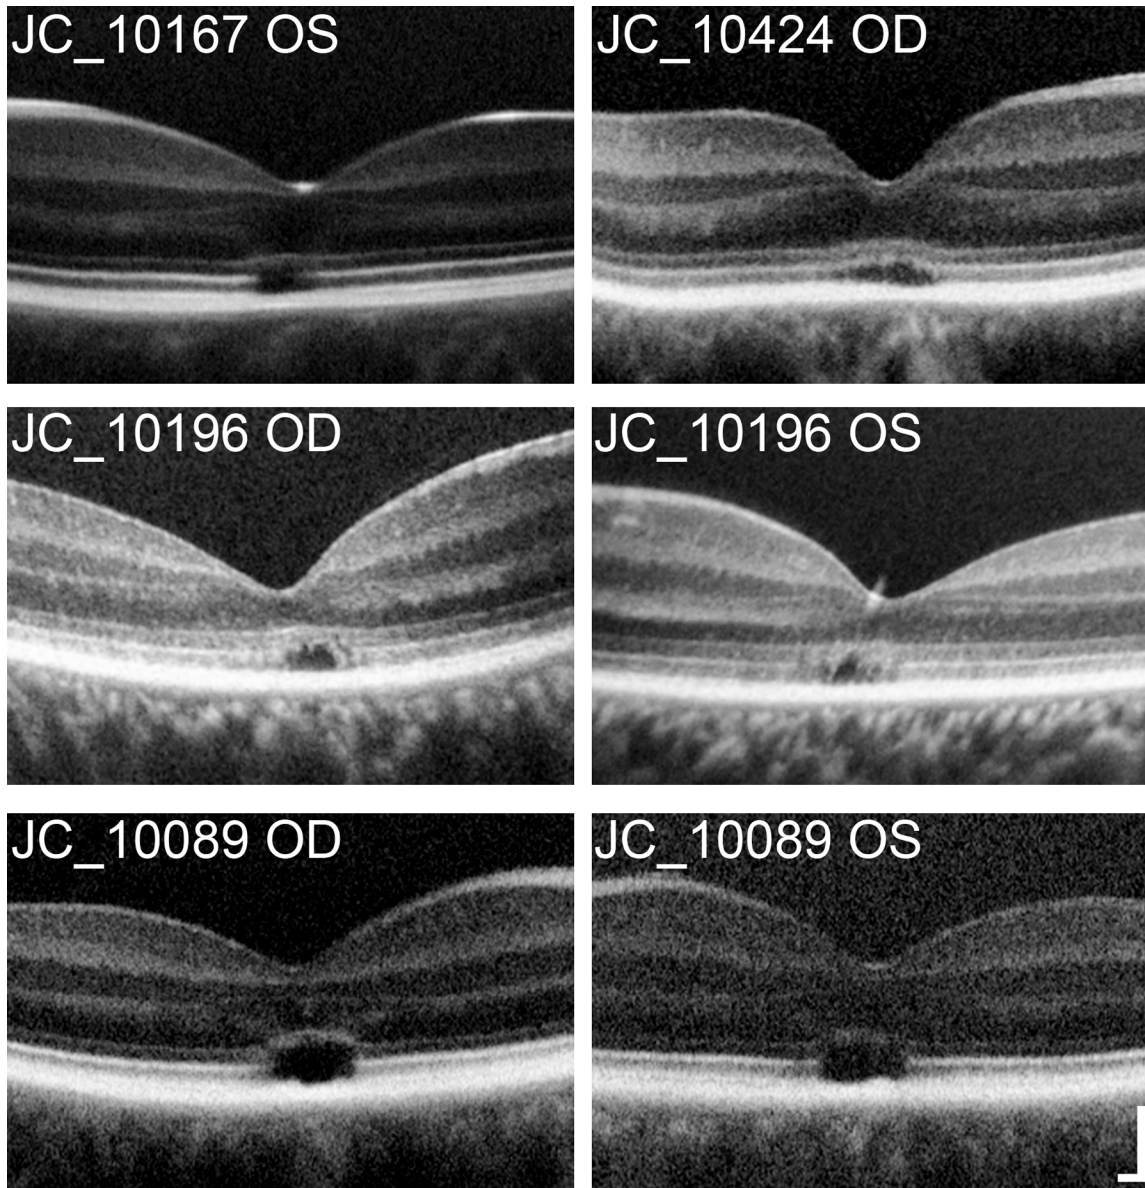

292

293 **Figure 4:** Although excellent repeatability was observed overall, there were individual eyes with  
294 poor repeatability, most commonly due to low contrast of the OPL, making demarcation difficult  
295 (*top left*) or due to imprecise, widened boundaries (*top right*). The greatest ONL asymmetry  
296 between right and left eyes was observed in JC\_10196. ONL asymmetry was also observed in  
297 JC\_10089; however, it is likely that low signal also played a role in this apparent asymmetry.  
298 Scale bar = 100  $\mu$ m.

299 **References:**

- 300 1. Aboshiha J, Dubis AM, Carroll J, Hardcastle AJ, Michaelides M. The cone dysfunction syndromes.  
301 *Br J Ophthalmol.* 2016;100(1):115-121.
- 302 2. Kohl S, Zobor D, Chiang W, et al. Mutations in the unfolded protein response regulator *ATF6*  
303 cause the cone dysfunction disorder achromatopsia. *Nat Genet.* 2015;47(7):757-765.
- 304 3. Thiadens AA, Slingerland NW, Roosing S, et al. Genetic etiology and clinical consequences of  
305 complete and incomplete achromatopsia. *Ophthalmol.* 2009;116(10):1984-1989.
- 306 4. Kohl S, Coppieters F, Meire F, et al. A nonsense mutation in *PDE6H* causes autosomal-recessive  
307 incomplete achromatopsia. *Am J Hum Genet.* 2012;91(3):527-532.
- 308 5. Kohl S, Baumann B, Rosenberg T, et al. Mutations in the cone photoreceptor G-protein  $\alpha$ -  
309 subunit gene *GNAT2* in patients with achromatopsia. *Am J Hum Genet.* 2002;71(2):422-425.
- 310 6. Kohl S, Varsanyi B, Antunes GA, et al. *CNGB3* mutations account for 50% of all cases with  
311 autosomal recessive achromatopsia. *Eur J Hum Genet.* 2005;13(3):302-308.
- 312 7. Langlo CS, Erker LR, Parker M, et al. Repeatability and longitudinal assessment of foveal cone  
313 structure in *CNGB3*-associated achromatopsia. *Retina.* 2017:1956-1966.
- 314 8. Aboshiha J, Dubis AM, Cowing J, et al. A prospective longitudinal study of retinal structure and  
315 function in achromatopsia. *Invest Ophthalmol Vis Sci.* 2014;55(9):5733-5743.
- 316 9. Thomas MG, McLean RJ, Kohl S, Sheth V, Gottlob I. Early signs of longitudinal progressive cone  
317 photoreceptor degeneration in achromatopsia. *Br J Ophthalmol.* 2012;96(9):1232-1236.
- 318 10. Sundaram V, Wilde C, Aboshiha J, et al. Retinal structure and function in achromatopsia:  
319 Implications for gene therapy. *Ophthalmol.* 2014;121(1):234-245.
- 320 11. Thiadens AA, Somervuo V, van den Born LI, et al. Progressive loss of cones in achromatopsia: An  
321 imaging study using spectral-domain optical coherence tomography. *Invest Ophthalmol Vis Sci.*  
322 2010;51(11):5952-5957.
- 323 12. Banin E, Gootwine E, Obolensky A, et al. Gene augmentation therapy restores retinal function  
324 and visual behavior in a sheep model of *CNGA3* achromatopsia. *Mol Ther.* 2015;23(9):1423-  
325 1433.
- 326 13. Carvalho LS, Xu J, Pearson R, et al. Long-term and age-dependent restoration of visual function  
327 in a mouse model of *CNGB3*-associated achromatopsia following gene therapy. *Hum Mol Gen.*  
328 2011;20(16):3161-3175.
- 329 14. Komáromy A, Alexander JJ, Rowlan JS, et al. Gene therapy rescues cone function in congenital  
330 achromatopsia. *Hum Mol Gen.* 2010;19(13):2581-2593.
- 331 15. Zobor D, Werner A, Stanzial F, et al. The clinical phenotype of *CNGA3*-related achromatopsia:  
332 Pretreatment characterization in preparation of a gene replacement therapy trial. *Invest*  
333 *Ophthalmol Vis Sci.* 2017;58(2):821-832.
- 334 16. Applied Genetic Technologies Corporation. Safety and efficacy trial of AAV gene therapy in  
335 patients with *CNGB3* achromatopsia. 2016;ClinicalTrials.gov Identifier: NCT02599922.
- 336 17. Applied Genetic Technologies Corporation. Safety and efficacy trial of AAV gene therapy in  
337 patients with *CNGA3* achromatopsia. 2016;ClinicalTrials.gov Identifier: NCT02935517.
- 338 18. STZ Eyetrial. Safety and efficacy of a single subretinal injection of rAAV.hCNGA3 in patients with  
339 *CNGA3*-linked achromatopsia. 2015;ClinicalTrials.gov Identifier: NCT02610582.
- 340 19. MeiraGTx. Gene therapy for achromatopsia (*CNGB3*). 2016;ClinicalTrials.gov Identifier:  
341 NCT03001310.
- 342 20. Roorda A. Adaptive optics ophthalmoscopy. *J Refract Surg.* 2000;16:S602-S607.
- 343 21. Dubra A, Sulai Y, Norris JL, et al. Noninvasive imaging of the human rod photoreceptor mosaic  
344 using a confocal adaptive optics scanning ophthalmoscope. *Biomed Opt Express.*  
345 2011;2(7):1864-1876.



- 346 22. Rossi EA, Chung M, Dubra A, Hunter JJ, Merigan WH, Williams DR. Imaging retinal mosaics in the  
347 living eye. *Eye*. 2011;25(3):301-308.
- 348 23. Dubis AM, Cooper RF, Aboshiha J, et al. Genotype-dependent variability in residual cone  
349 structure in achromatopsia: Towards developing metrics for assessing cone health. *Invest*  
350 *Ophthalmol Vis Sci*. 2014;55(11):7303-7311.
- 351 24. Genead MA, Fishman GA, Rha J, et al. Photoreceptor structure and function in patients with  
352 congenital achromatopsia. *Invest Ophthalmol Vis Sci*. 2011;52(10):7298-7308.
- 353 25. Langlo CS, Patterson EJ, Higgins BP, et al. Residual foveal cone structure in *CNGB3*-associated  
354 achromatopsia. *Invest Ophthalmol Vis Sci*. 2016;57(10):3984-3995.
- 355 26. Scoles D, Sulai YN, Langlo CS, et al. In vivo imaging of human cone photoreceptor inner  
356 segments. *Invest Ophthalmol Vis Sci*. 2014;55(7):4244-4251.
- 357 27. Milam AH, Li ZY, Fariss RN. Histopathology of the human retina in retinitis pigmentosa. *Prog*  
358 *Retin Eye Res*. 1998;17(2):175-205.
- 359 28. Barthelmes C, Sutter FK, Kurz-Levin MM, et al. Qualitative analysis of OCT characteristics in  
360 patients with achromatopsia and blue-cone monochromatism. *Invest Ophthalmol Vis Sci*.  
361 2006;47(3):1161-1166.
- 362 29. Yang P, Michaels KV, Courtney RJ, et al. Retinal morphology of patients with achromatopsia  
363 during early childhood: Implications for gene therapy. *JAMA Ophthalmol*. 2014;132(7):823-831.
- 364 30. Thomas MG, Kumar A, Kohl S, Proudlock FA, Gottlob I. High-resolution in vivo imaging in  
365 achromatopsia. *Ophthalmol*. 2011;118(5):882-887.
- 366 31. Wilk MA, Wilk BM, Langlo CS, Cooper RF, Carroll J. Evaluating outer segment length as a  
367 surrogate measure of peak foveal cone density. *Vision Res*. 2017;130:57-66.
- 368 32. Tanga L, Roberti G, Oddone F, et al. Evaluating the effect of pupil dilation on spectral-domain  
369 optical coherence tomography measurements and their quality score. *BMC Ophthalmol*.  
370 2015;15:175.
- 371 33. Schneider CA, Rasband WS, Eliceiri KW. NIH image to ImageJ: 25 years of image analysis. *Nat*  
372 *Methods*. 2012;9(7):671-675.
- 373 34. Tanna H, Dubis AM, Ayub N, et al. Retinal imaging using commercial broadband optical  
374 coherence tomography. *Br J Ophthalmol*. 2010;94(3):372-376.
- 375 35. Thévenaz P, Ruttimann UE, Unser M. A pyramid approach to subpixel registration based on  
376 intensity. *IEEE Trans Image Process*. 1998;7(1):27-41.
- 377 36. Ooto S, Hangai M, Tomidokoro A, et al. Effects of age, sex, and axial length on the three-  
378 dimensional profile of normal macular layer structures. *Invest Ophthalmol Vis Sci*.  
379 2011;52(12):8769-8779.
- 380 37. Won JY, Kim SE, Park YH. Effect of age and sex on retinal layer thickness and volume in normal  
381 eyes. *Medicine*. 2016;95(46):e5441.
- 382 38. Nieves-Moreno M, Martínez-de-la-Casa JM, Morales-Fernández L, Sánchez-Jean R, Sáenz-  
383 Francés F, García-Feijó J. Impacts of age and sex on retinal layer thicknesses measured by  
384 spectral domain optical coherence tomography with Spectralis. *PLoS One*. 2018;13(3):e0194169.
- 385 39. Tong KK, Lujan BJ, Zhou Y, Lin MC. Directional optical coherence tomography reveals reliable  
386 outer nuclear layer measurements. *Optom Vis Sci*. 2016;93(7):714-719.
- 387 40. Chui TY, Song H, Clark CA, Papay JA, Burns SA, Elsner AE. Cone photoreceptor packing density  
388 and the outer nuclear layer thickness in healthy subjects. *Invest Ophthalmol Vis Sci*.  
389 2012;53(7):3545-3553.
- 390 41. Jacobson SG, Cideciyan AV, Aguirre GD, et al. Improvement in vision: A new goal for treatment  
391 of hereditary retinal degenerations. *Expert Opin Orphan Drugs*. 2015;3(5):563-575.

- 392 42. Cideciyan AV, Jacobson SG, Beltran WA, et al. Human retinal gene therapy for Leber congenital  
393 amaurosis shows advancing retinal degeneration despite enduring visual improvement. *Proc*  
394 *Natl Acad of Sci USA*. 2013;110(6):E517-E525.
- 395 43. Staurengi G, Sadda S, Chakravarthy U, Spaide RF, Panel IO. Proposed lexicon for anatomic  
396 landmarks in normal posterior segment spectral-domain optical coherence tomography: The  
397 IN•OCT consensus. *Ophthalmol*. 2014;121(8):1572-1578.
- 398
